# Supplementary material for: Draft Genome Sequence Analyses of Two Novel Marinobacter suadae sp. nov. and Wenyingzhuangia gilva sp. nov. Isolated from the Root of Suaeda japonica Makino
Source: MDPI journal article supplement (doi:10.3390/life14030296), 2024-02-22
Supplement: s1 [file s1]

## **Supplementary Materials**

### **Draft Genome Sequence Analyses of Two Novel *Marinobacter suadae* sp. nov. and *Wenyngzhuangia gilva* sp. nov., Isolated from the Root of *Suaeda japonica* Makino**

Department of Life Science, Dongguk University-Seoul, Goyang 10326, Republic of Korea;

eksvnd97@dgu.ac.kr (S.P.); duckling91@dgu.ac.kr (I.K.); lucky\_salman@dongguk.edu (G.C.);

joh2395@dongguk.edu (Y.J.); woohj999@dongguk.edu (H.W.)

**\*Corresponding author:**

**Taegun Seo**

Tel: +82-31-961-5135

Fax: +82-31-961-5348

**E-mail: tseo@dongguk.edu**

**Fig. S1.** 16S rRNA gene analysis based on phylogenetic trees constructed using the ML, NJ, and MP algorithms.

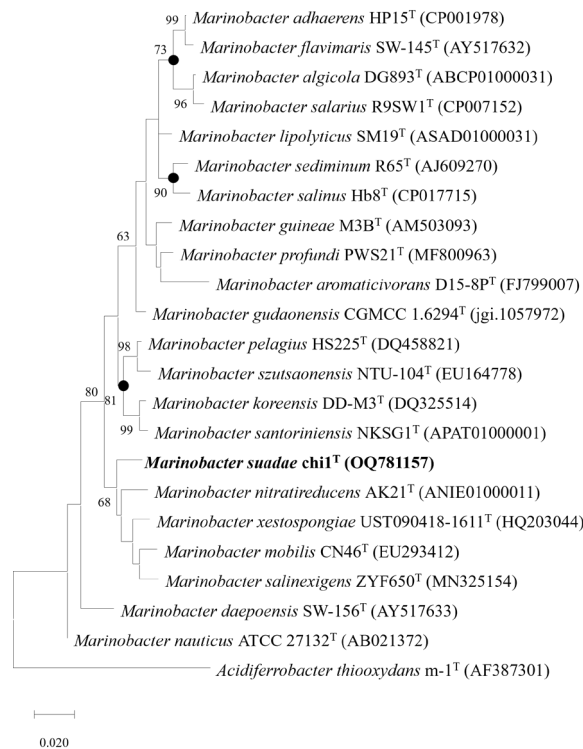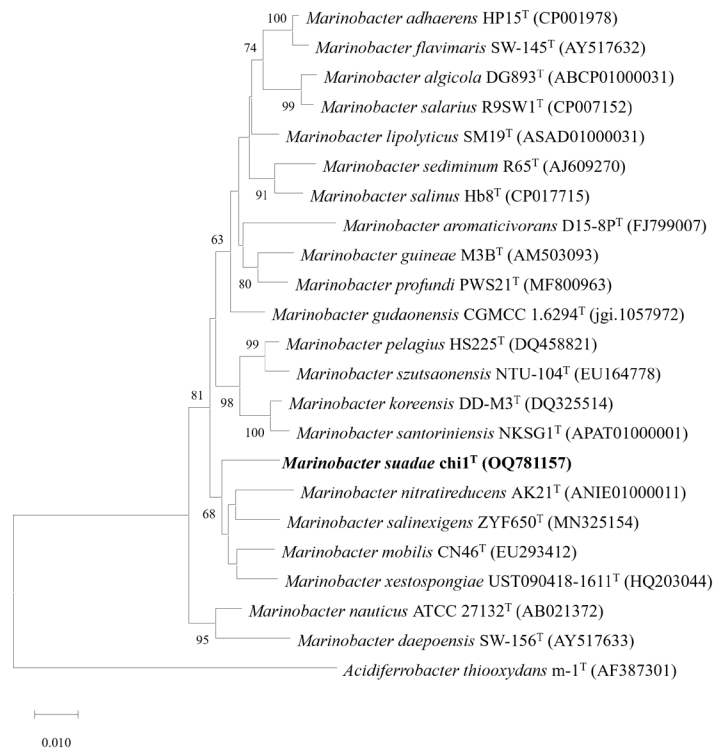

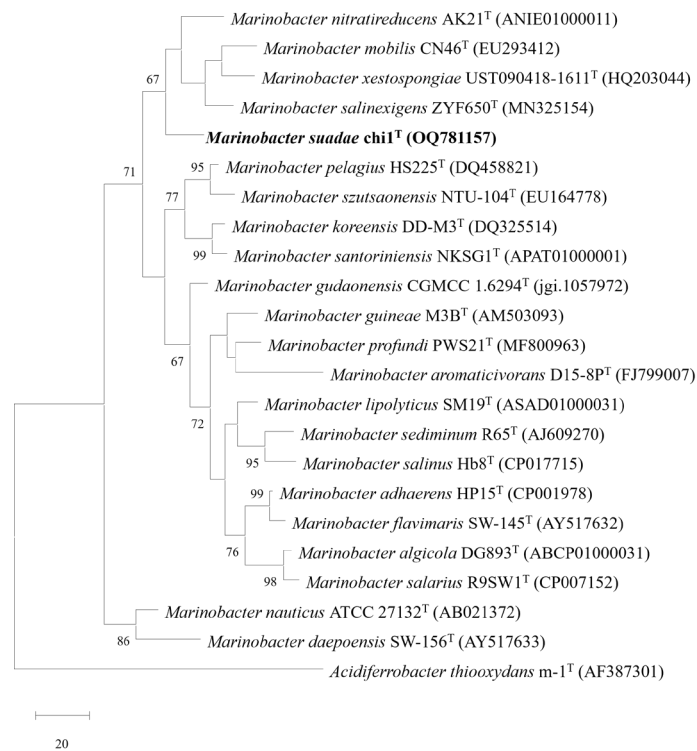

(A) Strain *chi1*<sup>T</sup> within the genus *Marinobacter*.

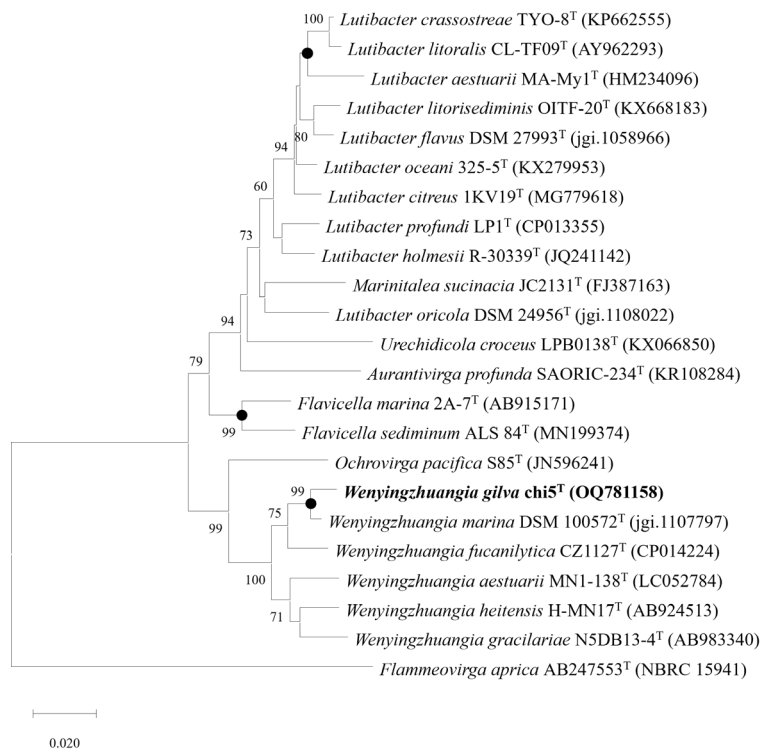

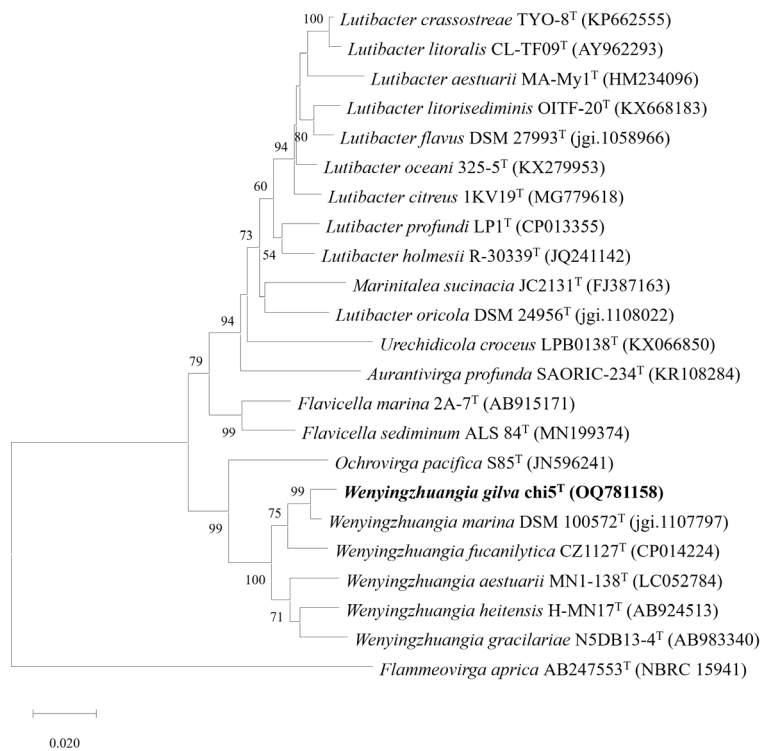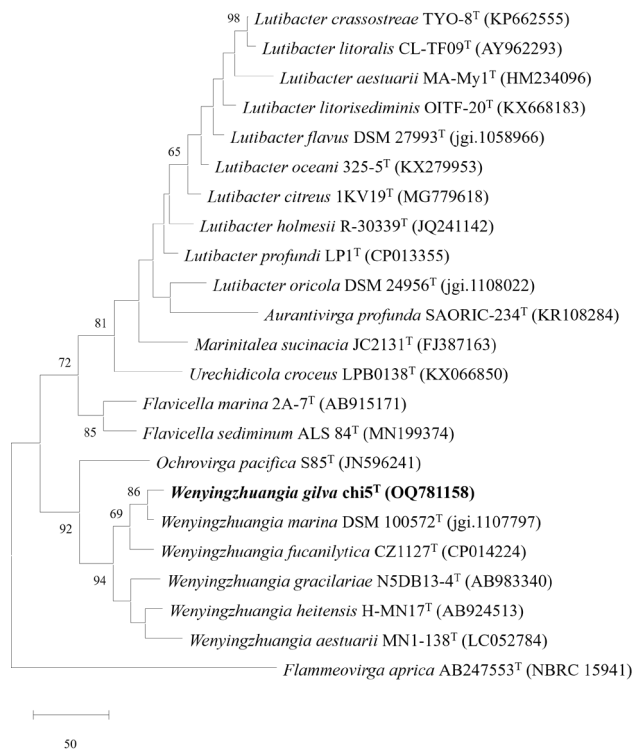

(B) Strain chi5<sup>T</sup> within the genus *Wenyingzhuangia*.

The bootstrap was set as a percentage of 1,000 replicates (above 60%). The outgroups used were *Acidiferrobacter thiooxydan* m-1<sup>T</sup> (AF387301) and *Flammeovirga aprica* AB247553<sup>T</sup> (NBRC 15941).

**Fig. S2.** UpSet table showing the orthologous clusters of strain chi1<sup>T</sup> and their closely related reference strains (A), while strain chi5<sup>T</sup> and their closely related reference strains (B).

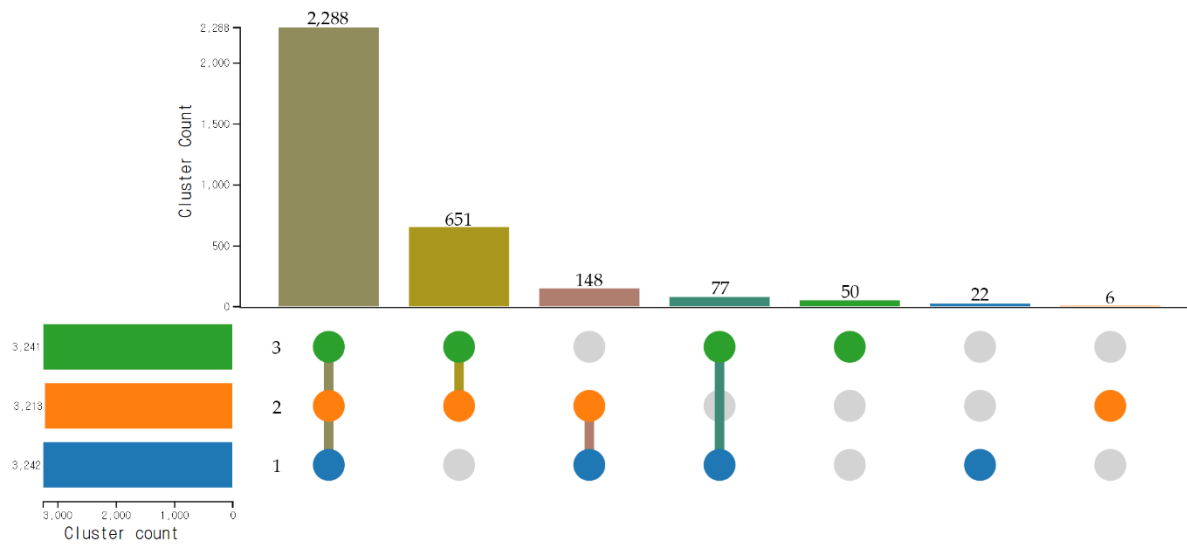

(A) *Marinobacter suadae* sp. nov.

Strains: 1, *M. suadae* chi1; 2, *M. nitratireducens* AK21<sup>T</sup>; 3, *M. salinexigens* ZYF650<sup>T</sup>.

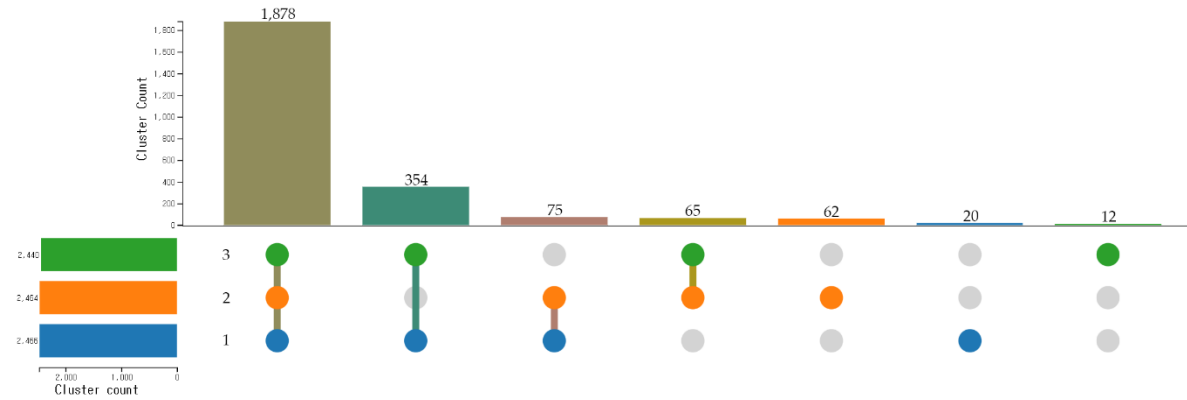

(B) *Wenyingzhuangia gilva* sp. nov.

Strains: 1, *W. gilva* chi5<sup>T</sup>; 2, *W. fucanilytica* CZ1127<sup>T</sup>; 3, *W. marina* DSM 100572<sup>T</sup>.

**Fig. S3.** Strains *chi1<sup>T</sup>* and *chi5<sup>T</sup>* were incubated at 30°C for 3 days on marine agar and LB agar, respectively, and observed under a transmission electron microscope (JEM-1010; JEOL).

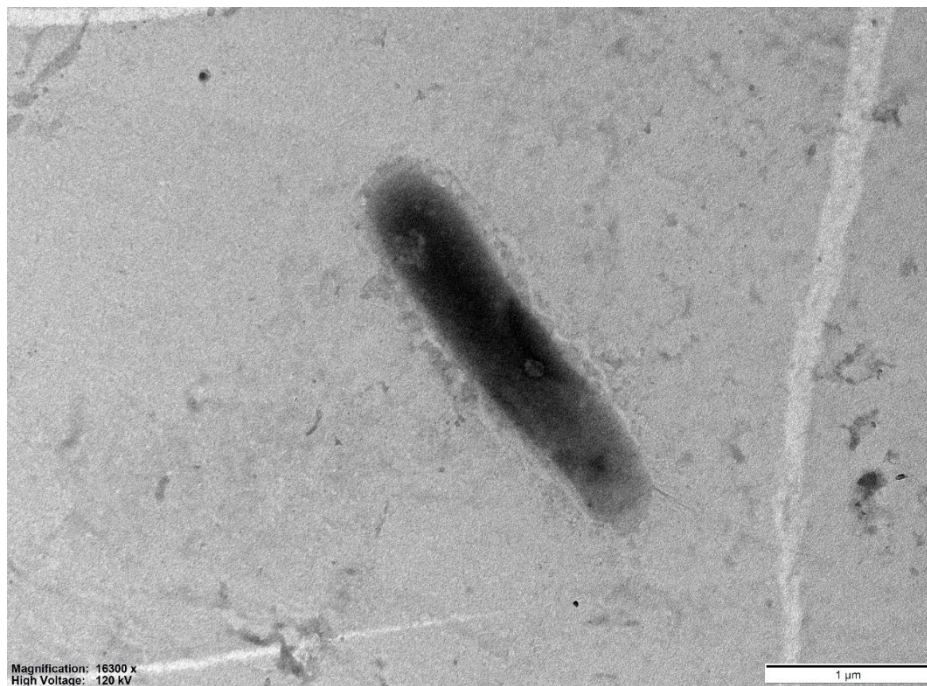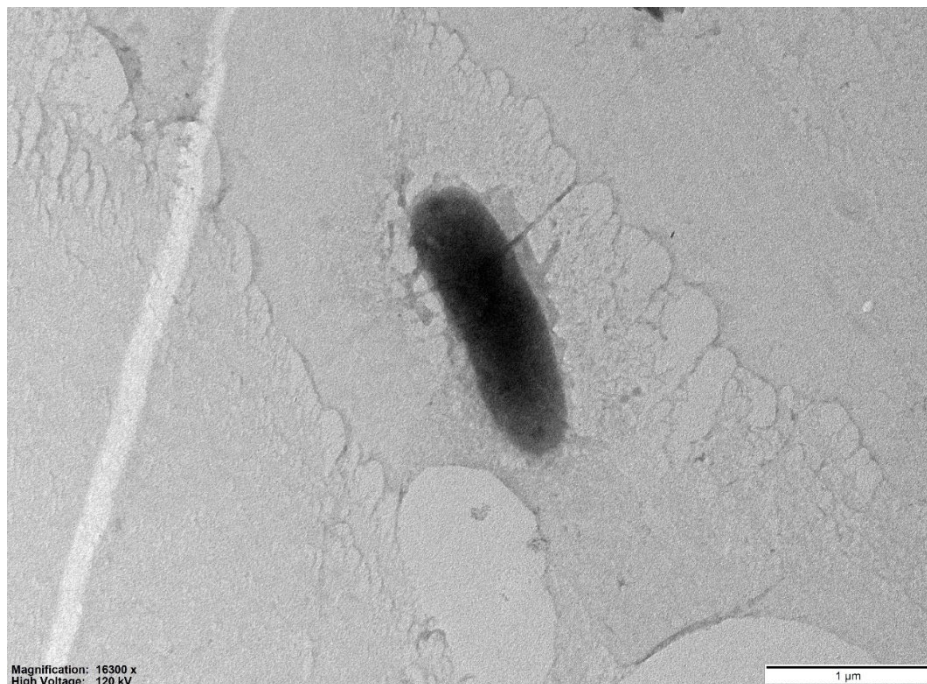

(A) *Marinobacter suadae* sp. nov.



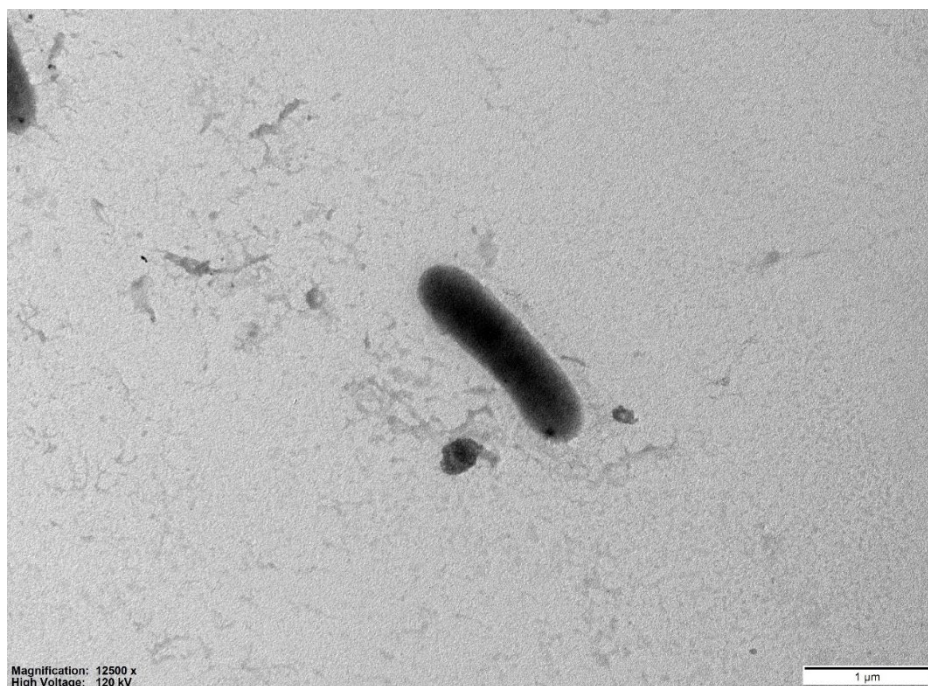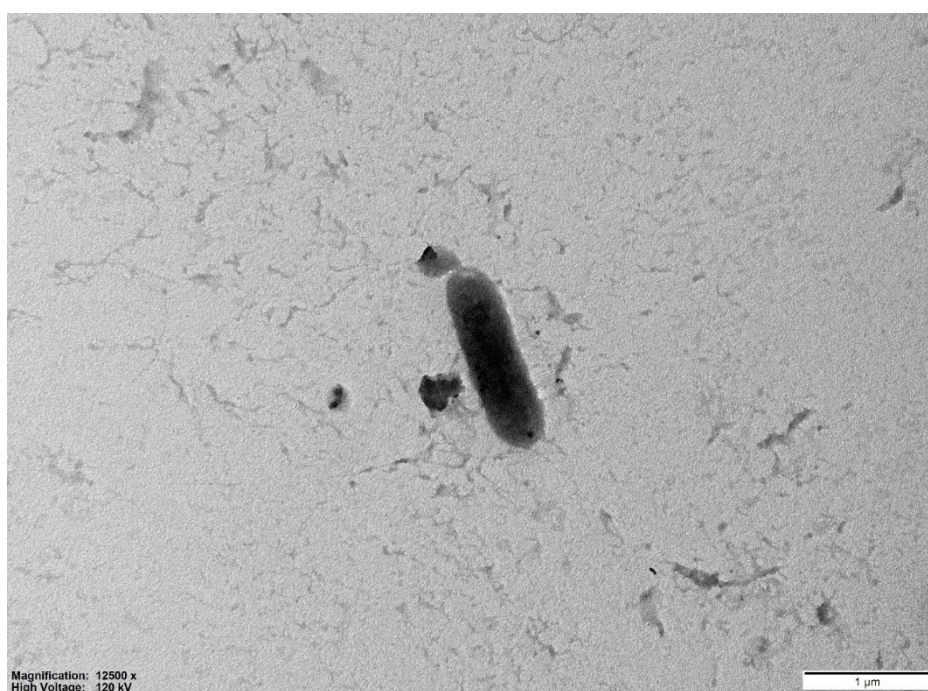

(B) *Wenyngzhuangia gilva* sp. nov.

**Fig. S4.** Presence of flagella according to NaCl concentration (w/v) change in strain *chi1<sup>T</sup>*.

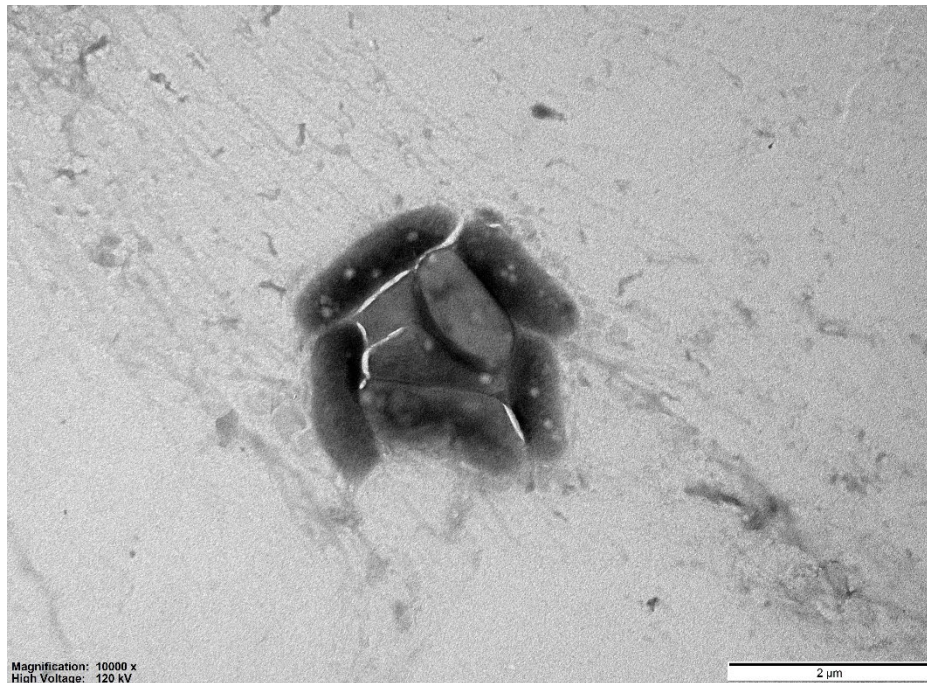

(A) *Marinobacter suadae* sp. nov. at a NaCl concentration of 3.5%.

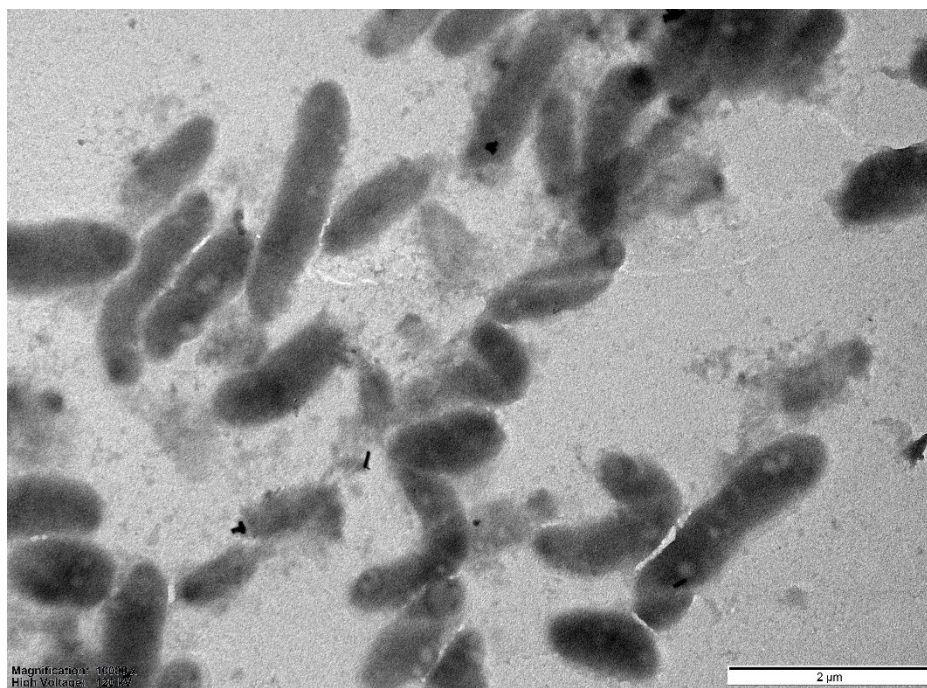

(B) *Marinobacter suadae* sp. nov. at a NaCl concentration of 9.0%.



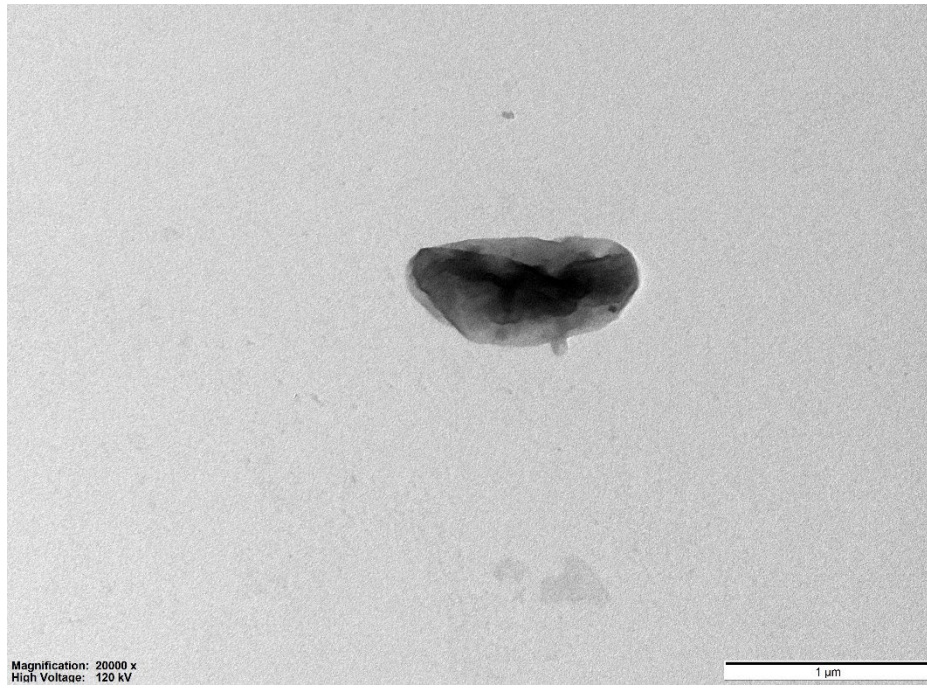

(C) *Marinobacter suadae* sp. nov. at a NaCl concentration of 15.0%.

**Fig. S5.** Results of two-dimensional thin-layer chromatography (TLC) showing the polar lipids profiles of the two novel strains *chi1<sup>T</sup>* and *chi5<sup>T</sup>*. A chloroform/methanol/water mixture (65:25:4, v/v/v) and a chloroform/acetic acid/methanol/water mixture (80:15:12:4, v/v/v/v) were used for the first and second directions, respectively.

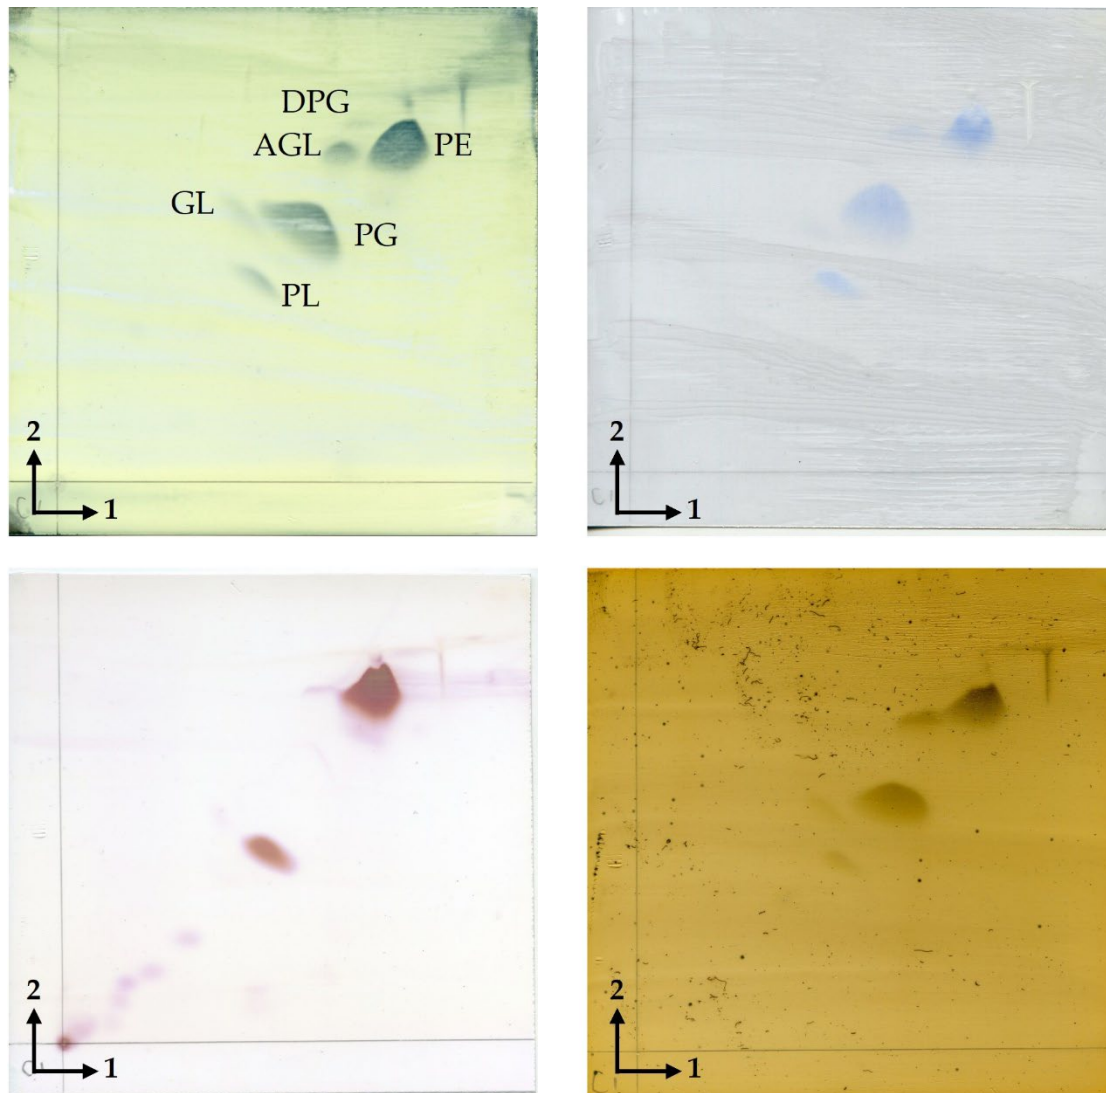

(A) *Marinobacter suadae* sp. nov.

one phospholipid (PL), one phosphatidylglycerol (PG), one diphosphatidylglycerol (DPG), one aminoglycolipid (AGL), and one phosphatidylethanolamine (PE).

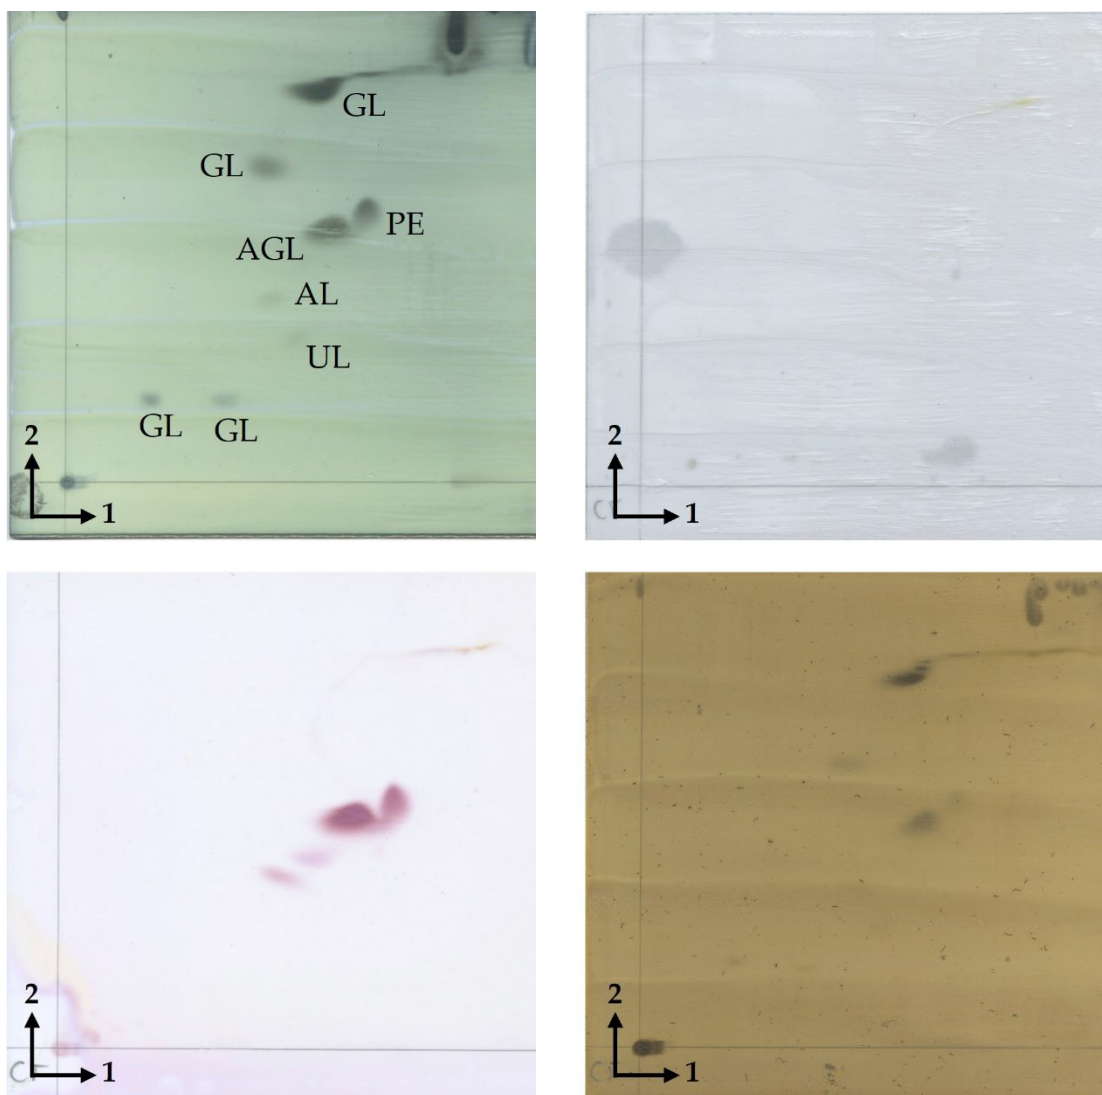

(B) *Wenyingzhuangia gilva* sp. nov.

one phosphatidylethanolamine (PE), four glycolipids (GLs), one aminolipid (AL), one aminoglycolipid (AGL), and one unidentified lipid (UL).

**Table S1.** Genomic features of strains chi1<sup>T</sup> and chi5<sup>T</sup> and reference strains belonging to the genera *Marinobacter* and *Wenyngzhuangia*, respectively.

(A) Genomic features of strain chi1<sup>T</sup> and reference strains.

| Characteristics       | Species   |           |           |
|-----------------------|-----------|-----------|-----------|
|                       | 1         | 2         | 3         |
| Genome length (bp)    | 3,572,209 | 3,890,033 | 4,240,922 |
| Contigs               | 6         | 22        | 149       |
| Contig N50 bp         | 1,388,190 | 552,815   | 527,644   |
| Number of rRNAs       | 6         | 3         | 7         |
| Number of tRNAs       | 46        | 45        | 50        |
| Total gene count      | 3,286     | 3,543     | 3,915     |
| Total protein count   | 3,230     | 3,491     | 3,854     |
| DNA G + C content (%) | 57.2      | 56.7      | 55.6      |

Strains: 1, *M. suaedae* chi1<sup>T</sup>; 2, *M. nitratireducens* AK21<sup>T</sup>; 3, *M. salinexigens* ZYF650<sup>T</sup>.

(B) Genomic features of strain chi5<sup>T</sup> and reference strains.

| Characteristics     | Species   |           |           |           |           |
|---------------------|-----------|-----------|-----------|-----------|-----------|
|                     | 1         | 2         | 3         | 4         | 5         |
| Genome length (bp)  | 3,353,634 | 3,526,759 | 3,427,057 | 3,668,833 | 3,242,070 |
| Contigs             | 34        | 6         | N/D       | 29        | 12        |
| Contig N50 bp       | 383,849   | 201,914   | N/D       | 1,935,568 | 707,963   |
| Number of rRNAs     | 6         | 4         | 12        | 3         | 3         |
| Number of tRNAs     | 45        | 45        | 52        | 45        | 45        |
| Total gene count    | 2,909     | 3,045     | 2,871     | 3,123     | 2,810     |
| Total protein count | 2,854     | 2,961     | 2,792     | 3,033     | 2,737     |
| DNA G+C content (%) | 31.5      | 31.8      | 31.6      | 31.4      | 31.2      |

Strains: 1, *W. gilva* chi5<sup>T</sup>; 2, *W. aestuarii* DSM 105044<sup>T</sup>; 3, *W. fucanilytica* CZ1127<sup>T</sup>; 4, *W. heitensis* DSM

101599<sup>T</sup>; 5, *W. marina* DSM 100572<sup>T</sup>. N/D, no data.



**Table S2.** Flagella and motility gene profiles of strain chi1<sup>T</sup>.

| Gene                  | Accession    | Length (aa) |
|-----------------------|--------------|-------------|
| <i>FliL</i>           | WP_302909520 | 51          |
| <i>MotA/TolQ/ExbB</i> | WP_302909899 | 460         |

**Table S3.** Secondary metabolite gene cluster profiles of strains chi1<sup>T</sup> and chi5<sup>T</sup>.(A) Gene cluster profiles of strain chi1<sup>T</sup>.

| Region | Type                   | From      | To        | Most similar known cluster | Similarity (%) |
|--------|------------------------|-----------|-----------|----------------------------|----------------|
| 1.1    | Ectoine                | 1,503,503 | 1,513,898 | -                          | -              |
| 1.2    | Redox-cofactor         | 1,747,656 | 1,769,819 | Lankacidin C               | 13             |
| 2.1    | RiPP-like              | 287,731   | 299,923   | -                          | -              |
| 2.2    | NRPS-like, T1PKS, NRPS | 605,619   | 658,653   | -                          | -              |
| 2.3    | Betalactone            | 702,342   | 726,527   | -                          | -              |
| 2.4    | Betalactone            | 1,091,039 | 1,122,812 | Plipastatin                | 15             |

(B) Gene cluster profiles of strain chi5<sup>T</sup>.

| Region | Type      | From    | To      | Most similar known cluster | Similarity (%) |
|--------|-----------|---------|---------|----------------------------|----------------|
| 1.1    | Ripp-like | 529,970 | 540,800 | -                          | -              |
| 6.1    | Terpene   | 154,597 | 175,433 | Carotenoid                 | 28             |

**Table S4.** Subsystem features of strains chi1<sup>T</sup> and chi5<sup>T</sup> and reference strains belonging to the genera *Marinobacter* and *Wenyinzhuangia*, respectively, as assessed using the RAST server.

(A) Subsystem features of strain chi1<sup>T</sup> and reference strains.

| Subsystem category distribution                        | Strains |     |     |
|--------------------------------------------------------|---------|-----|-----|
|                                                        | 1       | 2   | 3   |
| Amino acids and derivatives                            | 285     | 290 | 272 |
| Carbohydrates                                          | 149     | 211 | 176 |
| Cell division and cell cycle                           | 0       | 0   | 0   |
| Cell wall and capsule                                  | 22      | 28  | 26  |
| Cofactors, vitamins, prosthetic groups, and pigments   | 124     | 169 | 155 |
| DNA metabolism                                         | 59      | 73  | 69  |
| Dormancy and sporulation                               | 4       | 3   | 3   |
| Fatty acids, lipids, and isoprenoids                   | 89      | 103 | 93  |
| Iron acquisition and metabolism                        | 3       | 7   | 8   |
| Membrane transport                                     | 100     | 101 | 93  |
| Metabolism of aromatic compounds                       | 4       | 58  | 42  |
| Miscellaneous                                          | 15      | 13  | 10  |
| Motility and chemotaxis                                | 0       | 76  | 32  |
| Nitrogen metabolism                                    | 14      | 53  | 50  |
| Nucleosides and nucleotides                            | 73      | 74  | 59  |
| Phages, prophages, transposable elements, and plasmids | 2       | 7   | 5   |
| Phosphorus metabolism                                  | 24      | 21  | 23  |
| Photosynthesis                                         | 0       | 0   | 0   |
| Potassium metabolism                                   | 9       | 8   | 7   |
| Protein metabolism                                     | 198     | 204 | 197 |
| Regulation and cell signaling                          | 14      | 31  | 20  |
| Respiration                                            | 60      | 80  | 65  |
| RNA metabolism                                         | 51      | 54  | 52  |
| Secondary metabolism                                   | 4       | 4   | 4   |
| Stress response                                        | 56      | 64  | 70  |
| Sulfur metabolism                                      | 9       | 16  | 6   |
| Virulence, disease, and defense                        | 31      | 53  | 40  |

Strains: 1, *M. suaedae* chi1<sup>T</sup>; 2, *M. nitratreducens* AK21<sup>T</sup>; 3, *M. salinexigens* ZYF650<sup>T</sup>.

(B) Subsystem features of strain chi5<sup>T</sup> and reference strains

| Subsystem category distribution                           | Strains |     |     |
|-----------------------------------------------------------|---------|-----|-----|
|                                                           | 1       | 2   | 3   |
| Amino acids and derivatives                               | 151     | 230 | 237 |
| Carbohydrates                                             | 114     | 201 | 271 |
| Cell division and cell cycle                              | 3       | 26  | 27  |
| Cell wall and capsule                                     | 26      | 65  | 68  |
| Cofactors, vitamins,<br>prosthetic groups, and pigments   | 127     | 145 | 143 |
| DNA metabolism                                            | 48      | 67  | 74  |
| Dormancy and sporulation                                  | 2       | 3   | 4   |
| Fatty acids, lipids,<br>and isoprenoids                   | 18      | 43  | 56  |
| Iron acquisition and metabolism                           | 0       | 3   | 3   |
| Membrane transport                                        | 28      | 39  | 42  |
| Metabolism of<br>aromatic compounds                       | 6       | 14  | 10  |
| Miscellaneous                                             | 12      | 22  | 19  |
| Motility and chemotaxis                                   | 0       | 0   | 0   |
| Nitrogen metabolism                                       | 16      | 26  | 22  |
| Nucleosides and nucleotides                               | 49      | 63  | 64  |
| Phages, prophages,<br>transposable elements, and plasmids | 1       | 1   | 1   |
| Phosphorus metabolism                                     | 13      | 17  | 16  |
| Photosynthesis                                            | 0       | 0   | 0   |
| Potassium metabolism                                      | 11      | 17  | 15  |
| Protein metabolism                                        | 99      | 127 | 166 |
| Regulation and cell signaling                             | 6       | 16  | 33  |
| Respiration                                               | 24      | 47  | 42  |
| RNA metabolism                                            | 29      | 120 | 121 |
| Secondary metabolism                                      | 4       | 4   | 4   |
| Stress response                                           | 16      | 48  | 46  |
| Sulfur metabolism                                         | 13      | 35  | 27  |
| Virulence, disease, and defense                           | 24      | 49  | 44  |

Strains: 1, *W. gilva* chi5<sup>T</sup>; 2, *W. fucanilytica* CZ1127<sup>T</sup>; 3, *W. marina* DSM 100572<sup>T</sup>.



**Table S5.** Number of ORFs in the novel strains chi1<sup>T</sup> and chi5<sup>T</sup> compared with those in related species belonging to the genera *Marinobacter* and *Wenyingzhuangia*, respectively.

(A) Number of ORFs in strain chi1<sup>T</sup> and closely related species.

| Characteristics             | Species |    |    |
|-----------------------------|---------|----|----|
|                             | 1       | 2  | 3  |
| Auxiliary activity          | 7       | 7  | 10 |
| Carbohydrate-binding module | 0       | 1  | 6  |
| Carbohydrate esterase       | 7       | 6  | 1  |
| Glycoside hydrolase         | 8       | 13 | 12 |
| Glycosyl transferase        | 30      | 34 | 42 |
| Polysaccharide lyase        | 0       | 1  | 0  |
| Total ORF number            | 52      | 62 | 71 |

Strains: 1, *M. suaedae* chi1<sup>T</sup>; 2, *M. nitratreducens* AK21<sup>T</sup>; 3, *M. salinexigens* ZYF650<sup>T</sup>.

(B) Number of ORFs in strain chi5<sup>T</sup> and closely associated species.

| Characteristics             | Species |     |     |     |     |
|-----------------------------|---------|-----|-----|-----|-----|
|                             | 1       | 2   | 3   | 4   | 5   |
| Carbohydrate-binding module | 7       | 2   | 13  | 2   | 4   |
| Carbohydrate esterase       | 22      | 13  | 14  | 9   | 19  |
| Glycoside hydrolase         | 122     | 107 | 145 | 131 | 124 |
| Glycosyl transferase        | 52      | 47  | 51  | 53  | 53  |
| Polysaccharide lyase        | 15      | 5   | 17  | 8   | 10  |
| Total ORF number            | 218     | 174 | 240 | 203 | 210 |

Strains: 1, *W. gilva* chi5<sup>T</sup>; 2, *W. aestuarii* DSM 105044<sup>T</sup>; 3, *W. fucanilytica* CZ1127<sup>T</sup>; 4, *W. heitensis* DSM 101599<sup>T</sup>; 5, *W. marina* DSM 100572<sup>T</sup>.

**Table S6.** Results of pangenomic analysis of the novel strains chi1<sup>T</sup> and chi5<sup>T</sup> and reference strains belonging to the genera *Marinobacter* and *Wenyinzhuangia*, respectively, using Build Pangenome with OrthoMCL version 2.0.

(A) Pangenomic profiles of strain chi1<sup>T</sup> and closely related species.

| Genome                                              | Genes | Homologous genes | Singleton genes | Homologous families |
|-----------------------------------------------------|-------|------------------|-----------------|---------------------|
| <i>M. suaedae</i> chi1 <sup>T</sup>                 | 3,230 | 3,033            | 197             | 2,969               |
| <i>M. guineae</i> M3B <sup>T</sup>                  | 4,130 | 3,876            | 254             | 3,780               |
| <i>M. adhaerens</i> HP15 <sup>T</sup>               | 4,410 | 3,895            | 515             | 3,773               |
| <i>M. flavimaris</i> KCTC 12185 <sup>T</sup>        | 4,077 | 3,843            | 234             | 3,732               |
| <i>M. sediminum</i> R65 <sup>T</sup>                | 3,356 | 3,209            | 147             | 3,166               |
| <i>M. gudaonensis</i> CGMCC 1.6294 <sup>T</sup>     | 3,434 | 3,312            | 122             | 3,259               |
| <i>M. algicola</i> DG893 <sup>T</sup>               | 4,127 | 3,817            | 310             | 3,655               |
| <i>M. salinus</i> Hb8 <sup>T</sup>                  | 3,732 | 3,540            | 192             | 3,476               |
| <i>M. lipolyticus</i> SM19 <sup>T</sup>             | 3,620 | 3,458            | 162             | 3,370               |
| <i>M. pelagius</i> HS225 <sup>T</sup>               | 3,473 | 3,326            | 147             | 3,257               |
| <i>M. nitratreducens</i> AK21 <sup>T</sup>          | 3,491 | 3,402            | 89              | 3,331               |
| <i>M. santoriniensis</i> NKSG1 <sup>T</sup>         | 3,690 | 3,509            | 181             | 3,416               |
| <i>M. profrundi</i> PWS21 <sup>T</sup>              | 3,605 | 3,446            | 159             | 3,340               |
| <i>M. nauticus</i> ATCC 49840 <sup>T</sup>          | 3,614 | 3,481            | 133             | 3,419               |
| <i>M. koreensis</i> DD-M3 <sup>T</sup>              | 3,475 | 3,347            | 128             | 3,305               |
| <i>M. salinexigens</i> ZYF650 <sup>T</sup>          | 3,855 | 3,592            | 263             | 3,474               |
| <i>M. xestospongiae</i> UST090418-1611 <sup>T</sup> | 4,253 | 3,573            | 680             | 3,442               |
| <i>M. mobilis</i> CGMCC 1.7059 <sup>T</sup>         | 3,603 | 3,420            | 183             | 3,184               |
| <i>M. daepoensis</i> DSM 16072 <sup>T</sup>         | 3,484 | 3,257            | 227             | 3,206               |
| <i>M. aromaticivorans</i> D15-8P <sup>T</sup>       | 3,734 | 3,367            | 367             | 3,279               |
| <i>M. salarius</i> R9SW1 <sup>T</sup>               | 3,168 | 2,786            | 382             | 2,691               |

B) Pangenomic profiles of strain chi5<sup>T</sup> and closely related species.

| Genome                                      | Genes | Homologous genes | Singleton genes | Homologous families |
|---------------------------------------------|-------|------------------|-----------------|---------------------|
| <i>W. gilva</i> chi5 <sup>T</sup>           | 2,855 | 2,487            | 368             | 2,411               |
| <i>W. aestuarii</i> DSM 105044 <sup>T</sup> | 2,992 | 2,708            | 284             | 2,601               |
| <i>W. fucanilytica</i> CZ1127 <sup>T</sup>  | 2,803 | 2,503            | 300             | 2,353               |
| <i>W. heitensis</i> DSM 101599 <sup>T</sup> | 3,071 | 2,683            | 388             | 2,558               |
| <i>W. marina</i> DSM 100572 <sup>T</sup>    | 2,758 | 2,491            | 267             | 2,417               |

**Table S7.** Cellular fatty acid profiles of strains chi1<sup>T</sup> and chi5<sup>T</sup> and closely related reference strains.(A) Cellular fatty acid profiles of strain chi1<sup>T</sup> and closely related species.

| Fatty acid                            | Strains |      |      |
|---------------------------------------|---------|------|------|
|                                       | 1       | 2    | 3    |
| C <sub>12:0</sub>                     | 12.1    | 9.5  | 12.2 |
| C <sub>14:0</sub>                     | 0.8     | 2.4  | 2.9  |
| C <sub>16:0</sub>                     | 23.7    | 24.7 | 21.7 |
| C <sub>17:0</sub>                     | 2.1     | 1.0  | 2.6  |
| C <sub>12:0</sub> 3OH                 | 7.5     | 10.6 | 14.0 |
| Iso-C <sub>17:0</sub>                 | 1.0     | TR   | TR   |
| C <sub>16:1</sub> $\omega$ 5 <i>c</i> | 0.8     | TR   | TR   |
| C <sub>17:1</sub> $\omega$ 8 <i>c</i> | 3.5     | 1.1  | 1.7  |
| C <sub>18:1</sub> $\omega$ 9 <i>c</i> | 1.1     | 19.9 | 22.0 |
| <b>Summed feature 3*</b>              | 31.4    | 5.3  | 2.25 |
| <b>Summed feature 8*</b>              | 6.7     | N/D  | N/D  |
| <b>Summed feature 9*</b>              | 2.6     | –    | 1.2  |

Strains: 1, *M. suaedae* chi1<sup>T</sup>; 2, *M. nitratreducens* AK21<sup>T</sup>; 3, *M. salinexigens* ZYF650<sup>T</sup>.

\*Summed features are fatty acids that cannot be resolved reliably from other fatty acids using the chosen chromatographic conditions. The MIDI system groups these fatty acids into one feature with a single percentage of the total. Summed feature 3 consists of C<sub>16:1</sub>  $\omega$ 6*c* and/or C<sub>16:1</sub>  $\omega$ 7*c*. TR, the amount is less than 1% of the total; –, not detected; N/D, no data.

(B) Cellular fatty acid profiles of strain chi5<sup>T</sup> and closely related species.

| Fatty acid                | Strains |      |      |
|---------------------------|---------|------|------|
|                           | 1       | 3    | 5    |
| C <sub>10:0</sub>         | 1.0     | –    | –    |
| C <sub>12:0</sub>         | 9.9     | –    | –    |
| C <sub>14:0</sub>         | 4.6     | –    | –    |
| C <sub>15:0</sub>         | 1.4     | –    | –    |
| C <sub>16:0</sub>         | 3.5     | 3.5  | 2.2  |
| C <sub>18:0</sub>         | 1.2     | –    | –    |
| C <sub>16:0</sub> 3OH     | 1.5     | 3.7  | 1.5  |
| Iso-C <sub>15:0</sub> 3OH | 11.1    | 12.2 | 15.0 |
| Iso-C <sub>17:0</sub> 3OH | 14.7    | 17.4 | 15.2 |

|                          |      |      |      |
|--------------------------|------|------|------|
| Iso-C <sub>13:0</sub>    | 6.5  | 3.8  | 5.7  |
| Iso-C <sub>15:0</sub>    | 24.1 | 17.6 | 18.0 |
| Iso-C <sub>15:1</sub> G  | 6.2  | 6.3  | 12.0 |
| <b>Summed feature 3*</b> | 6.2  | 13.1 | 10.3 |

Strains: 1, *W. gilva* chi5<sup>T</sup>; 2, *W. fucanilytica* CZ1127<sup>T</sup>; 3, *W. marina* DSM 100572<sup>T</sup>.

\*Summed features are fatty acids that cannot be resolved reliably from other fatty acids using the chosen chromatographic conditions. The MIDI system groups these fatty acids into one feature with a single percentage of the total. Summed feature 3 consists of C<sub>16:1</sub>  $\omega$ 6c and/or C<sub>16:1</sub>  $\omega$ 7c. –, not detected.



**Table S8.** Polar lipids profiles of strains chi1<sup>T</sup> and chi5<sup>T</sup> and closely related reference strains.

| Polar lipids | Strains |   |   |
|--------------|---------|---|---|
|              | 1       | 2 | 3 |
| AGL          | 1       | 0 | 0 |
| AL           | 0       | 0 | 2 |
| APL          | 0       | 1 | 0 |
| DPG          | 1       | 1 | 1 |
| PE           | 1       | 1 | 1 |
| PG           | 1       | 1 | 1 |
| PL           | 1       | 2 | 2 |
| UL           | 0       | 1 | 3 |

Strains: 1, *M. suaedae* chi1<sup>T</sup>; 2, *M. nitratreducens* AK21<sup>T</sup>; 3, *M. salinexigens* ZYF650<sup>T</sup>.

| Polar lipids | Strains |    |   |
|--------------|---------|----|---|
|              | 4       | 5  | 6 |
| AGL          | 1       | 0  | 0 |
| AL           | 1       | 3  | 0 |
| GL           | 4       | 0  | 0 |
| PE           | 1       | 1  | 1 |
| PL           | 0       | 1  | 0 |
| UL           | 1       | 10 | 4 |

Strains: 1, *W. gilva* chi5<sup>T</sup>; 2, *W. fucanilytica* CZ1127<sup>T</sup>; 3, *W. marina* DSM 100572<sup>T</sup>.

Abbreviations: APL; unidentified aminophospholipid.
